# Supplementary material for: Mechanically strong multifunctional three-dimensional crosslinked aramid nanofiber/reduced holey graphene oxide and aramid nanofiber/reduced holey graphene oxide/polyaniline hydrogels and derived films
Source: Royal Society of Chemistry journal article supplement (doi:10.1039/d1nr03826e), 2021-01-01
Supplement: d1nr03826e1.pdf [file d1nr03826e1.pdf]

## **Supporting Information**

**Mechanically strong multifunctional three-dimensional crosslinked  
aramid nanofiber/holey graphene and aramid nanofiber/holey  
graphene/polyaniline hydrogels and derived films**

**Yubo Zou, Zeyu Chen, Zhiyuan Peng, Chuying Yu, Wenbin Zhong\***

College of Materials Science and Engineering, Hunan University, Changsha 410082,  
China

\*Corresponding Author: [wzhong@hnu.edu.cn](mailto:wzhong@hnu.edu.cn) (W. Zhong)

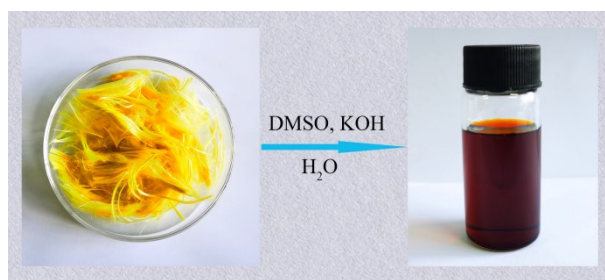

**Figure S1.** Illustration of the preparation of ANF dispersion from Kevlar nanofibers.

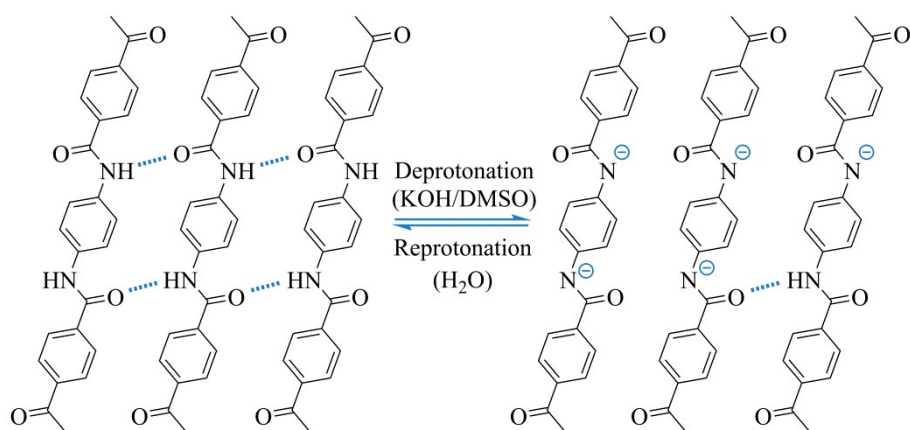

**Figure S2.** The deprotonation and reprotonation process of PPTA.

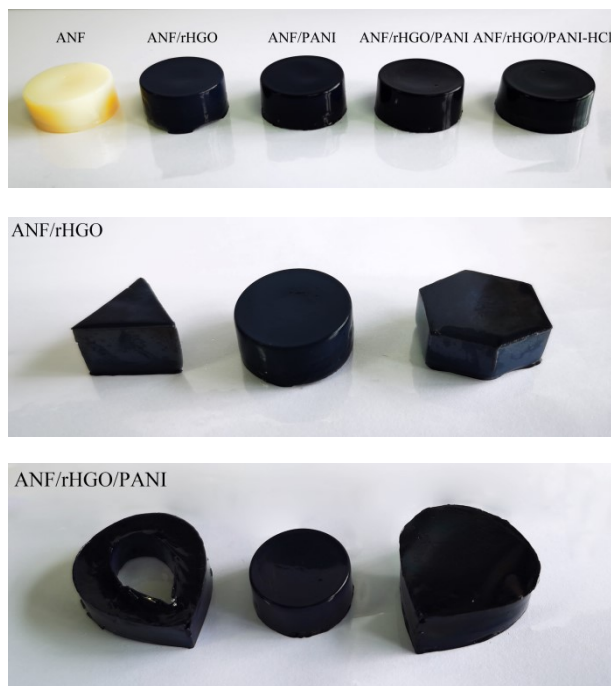

**Figure S3.** Illustrations of as-prepared hydrogel samples (upper), ANF/rHGO hydrogels (middle) and ANF/rHGO/PANI hydrogels (bottom) in different shapes casting from different models.

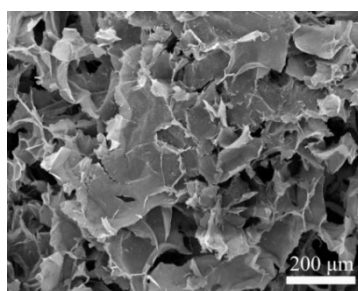

**Figure S4.** The SEM image of ANF/rHGO/PANI aerogel.

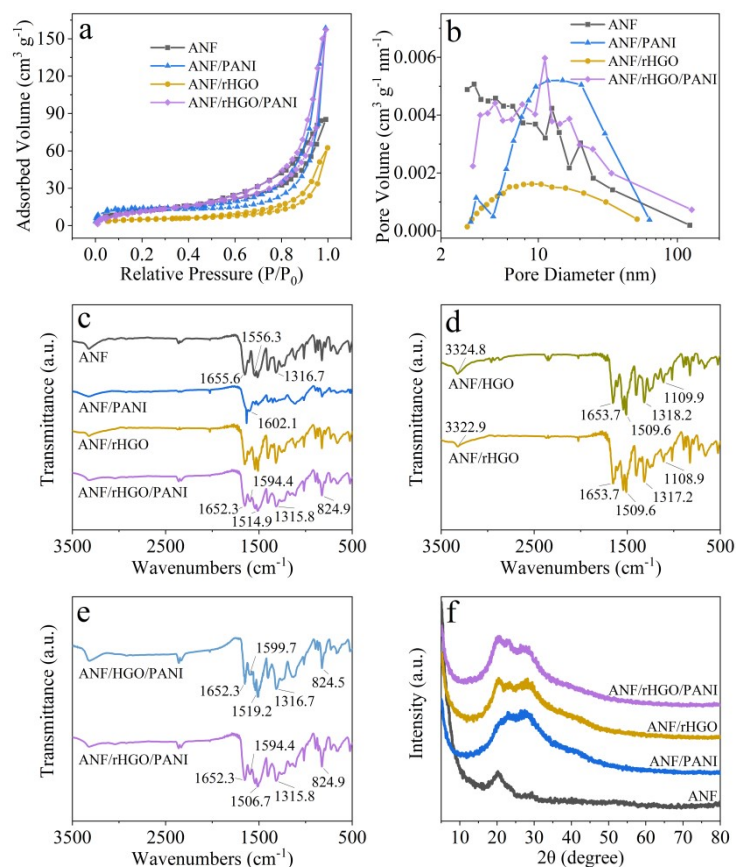

**Figure S5.** a) Adsorption-desorption isotherm curves, b) the pore size distribution by the BJH method, c-e) FT-IR spectra, f) XRD patterns.

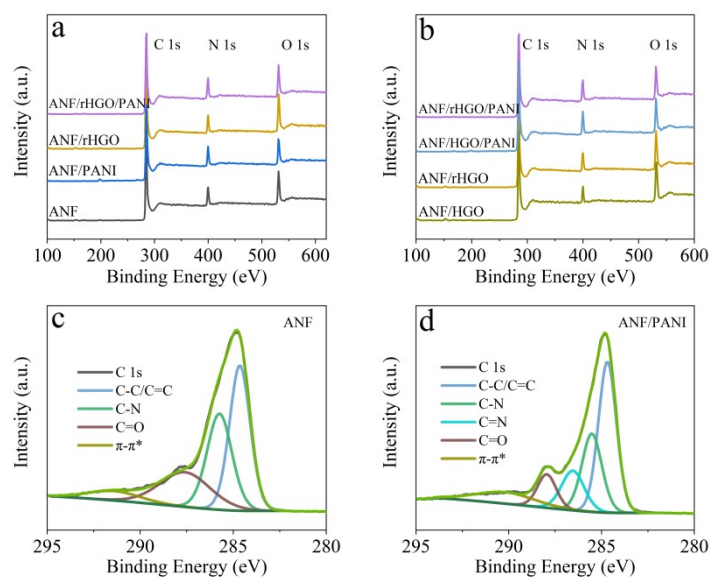

**Figure S6.** a-b) XPS spectra of as-prepared samples. c-d) C 1s spectra of c) ANF, d) ANF/PANI.

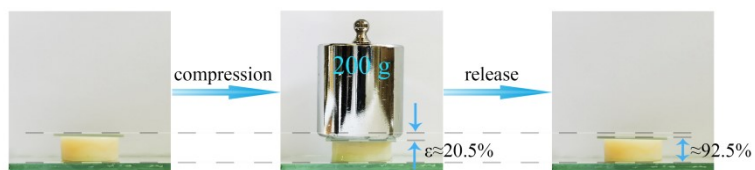

**Figure S7.** The compressive process for ANF hydrogel.

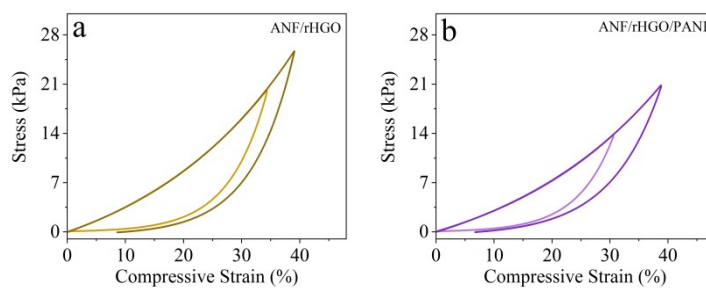

**Figure S8.** Compressive stress-strain curves with different strains for ANF/rHGO and ANF/rHGO/PANI hydrogels.

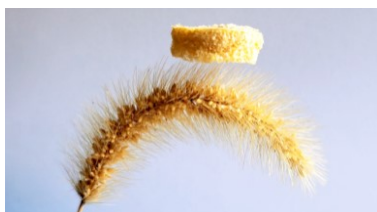

**Figure S9.** Illustration of ANF aerogel on setaria.

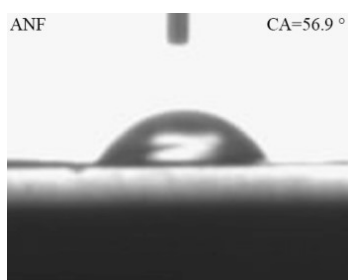

**Figure S10.** Illustration of static water contact angle on ANF film.

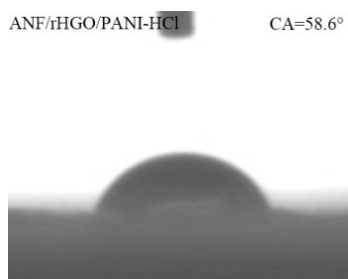

**Figure S11.** Illustration of static water contact angle on ANF/rHGO/PANI film after treating with 1 M HCl.

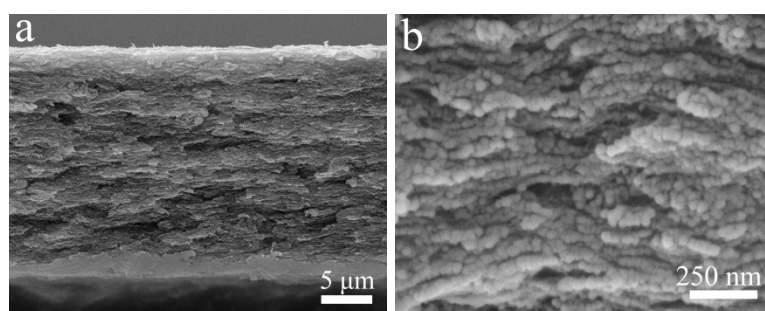

**Figure S12.** The SEM images of the rHGO/PANI film.

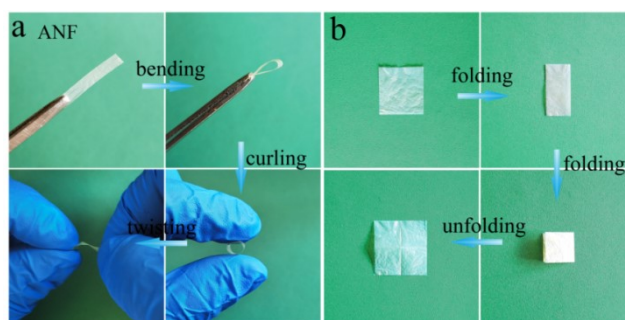

**Figure S13.** Illustrations of various mechanical states (initial, bending, folding, curling and twisting) of flexible ANF films.

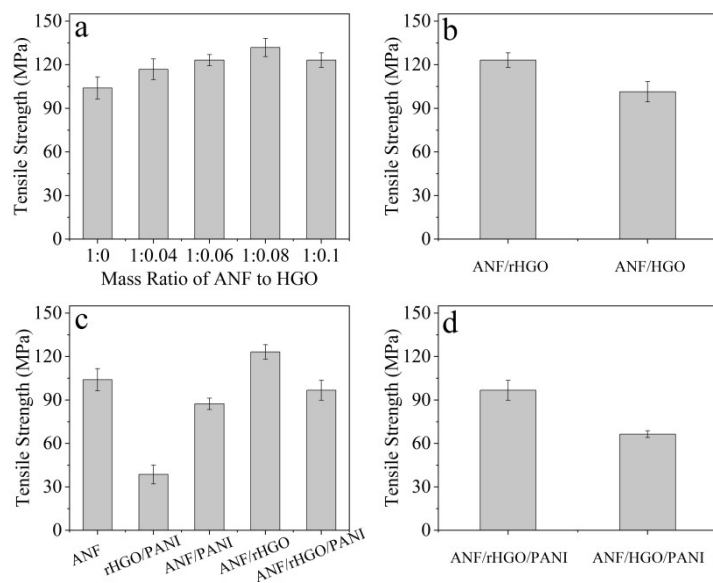

**Figure S14.** Averaged breaking tensile strength of (a) ANF/rHGO films with different mass ratios of ANF to HGO, (b) comparison of ANF/rHGO and ANF/HGO films, (c) as-prepared flexible films and (d) comparison of ANF/rHGO/PANI and ANF/HGO/PANI film samples.

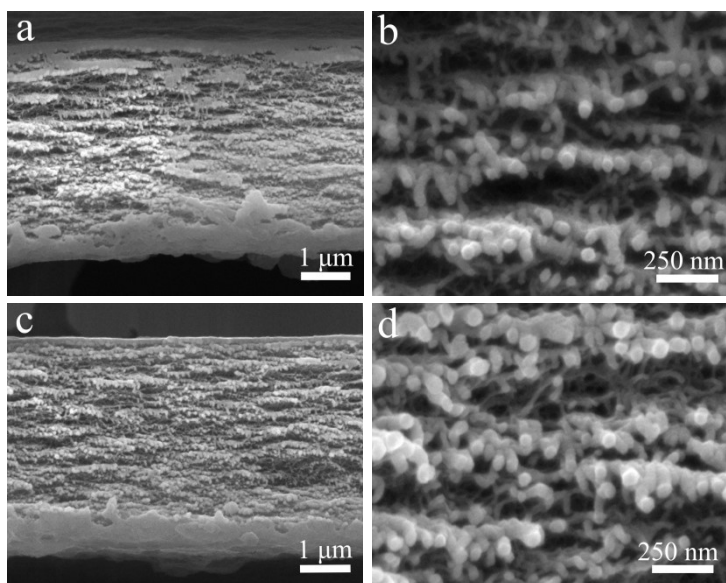

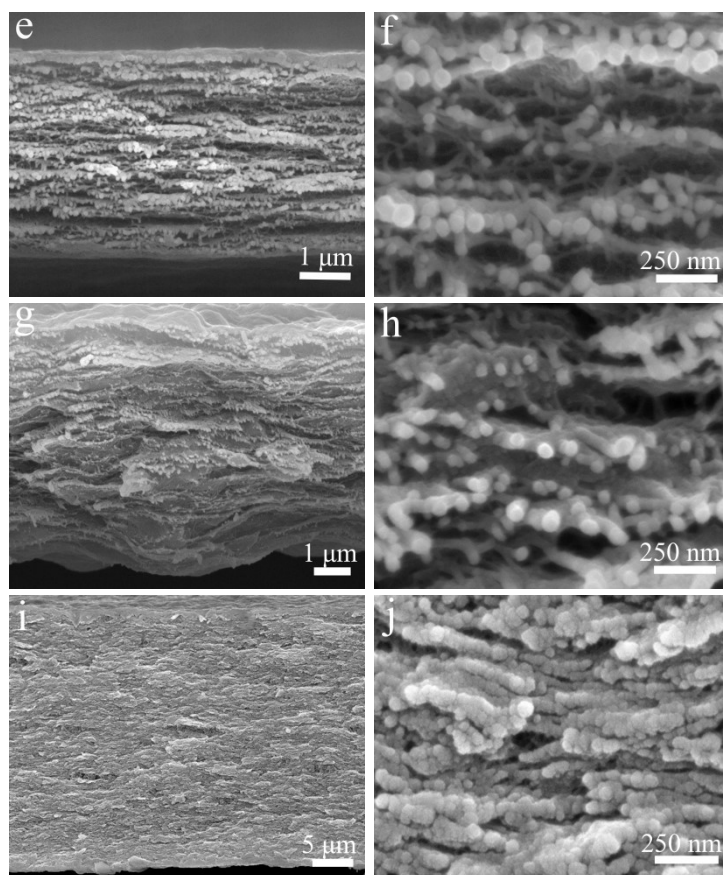

**Figure S15.** The SEM images of the fracture cross-section of a-b) ANF, c-d) ANF/PANI, e-f) ANF/rHGO, g-h) ANF/rHGO/PANI, i-j) rHGO/PANI films after tensile test.

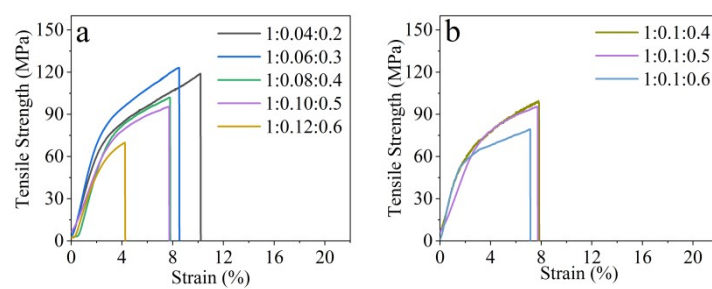



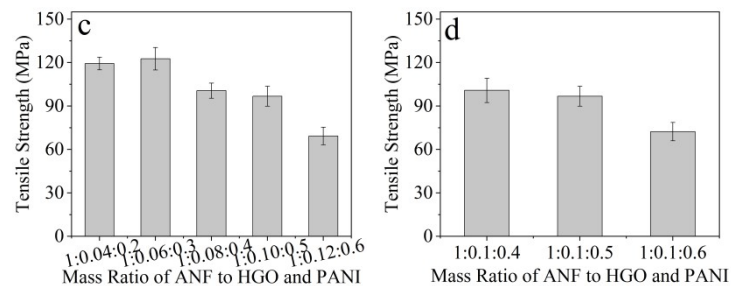

**Figure S16.** (a-b) Tensile strength test results and (c-d) averaged breaking tensile strength of ANF/rHGO/PANI composite samples with (a, c) different mass ratios (1:0.04:0.2, 1:0.06:0.3, 1:0.08:0.4, 1:0.10:0.5 and 1:0.12:0.6) of ANF, HGO and PANI and (b, d) different PANI contents (1:0.1:0.4, 1:0.1:0.5 and 1:0.1:0.6).

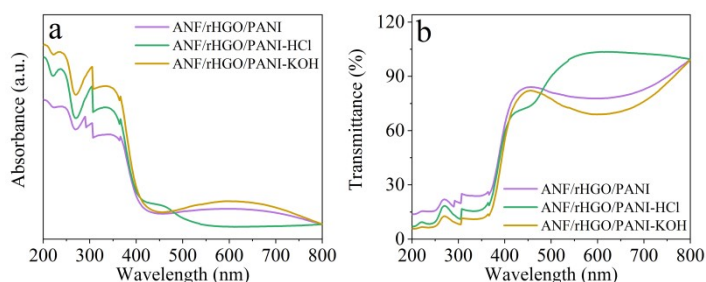

**Figure S17.** The UV-vis spectra of ANF/rHGO/PANI film post-treated by acidic or alkaline solution.

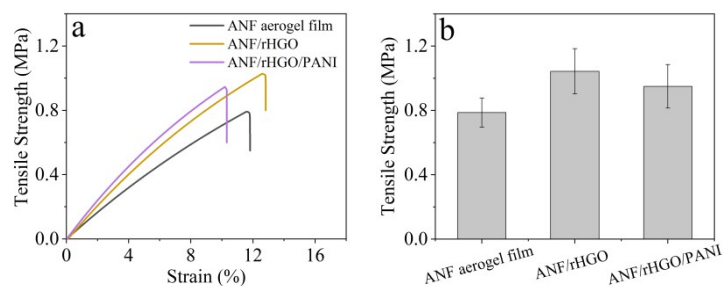

**Figure S18.** (a) The stress-strain curve and (b) averaged breaking tensile strength of ANF aerogel film, ANF/rHGO, and ANF/rHGO/PANI.

ANF, ANF/rHGO and ANF/rHGO/PANI aerogel film.

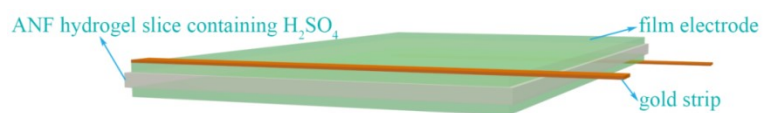

**Figure S19.** Schematic illustration for solid-state supercapacitor assembled using ANF/H<sub>2</sub>SO<sub>4</sub> hydrogel slice separating as-prepared film electrodes.

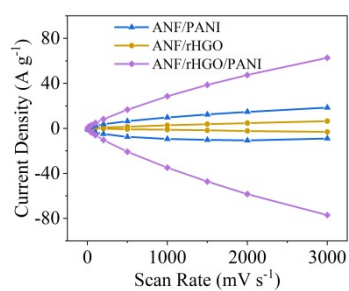

**Figure S20.** The plots of current density versus scan rate from CV curves.

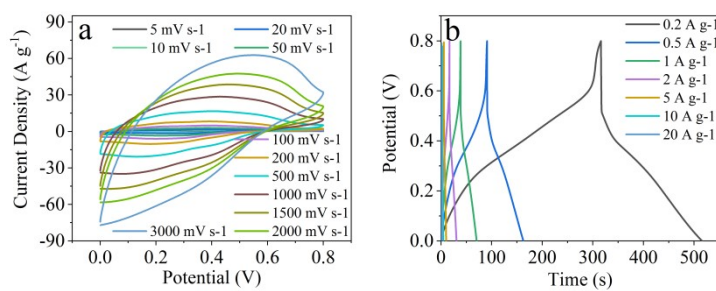

**Figure S21.** a) CV curves at various scan rates and b) GCD curves at various current densities for ANF/rHGO/PANI supercapacitor.

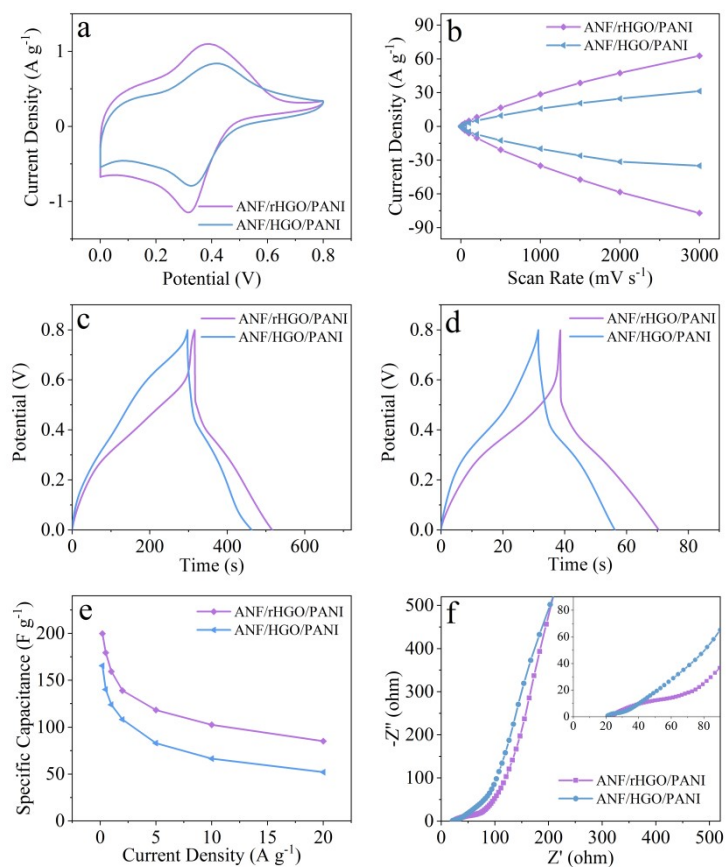

**Figure S22.** Electrochemical performance of ANF/rHGO/PANI and ANF/HGO/PANI supercapacitors: a) CV curves at 10 mV s<sup>-1</sup>, b) The plot of current density versus scan rate from CV curves, c) GCD curves at 0.2 A g<sup>-1</sup>, d) GCD curves at 1 A g<sup>-1</sup>, e) Specific capacitance against current density, and f) EIS plot.

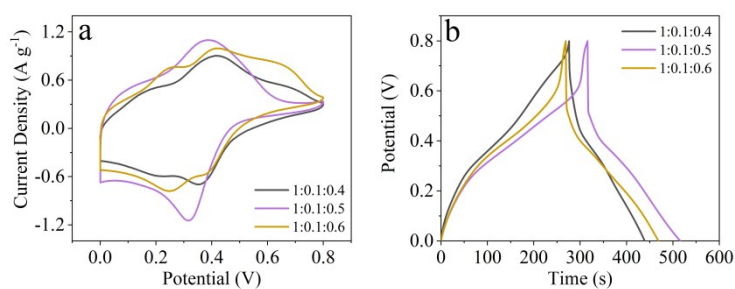

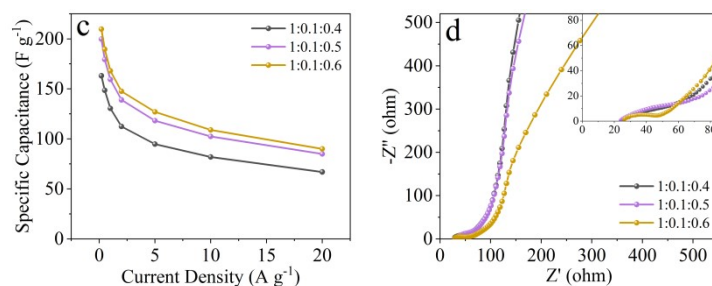

**Figure S23.** Electrochemical performance of ANF/rHGO/PANI composite supercapacitors with different PANI contents in composites: a) CV curves at  $10 \text{ mV s}^{-1}$ , b) GCD curves at  $0.2 \text{ A g}^{-1}$ , c) Specific capacitance against various current densities, and d) EIS plots.

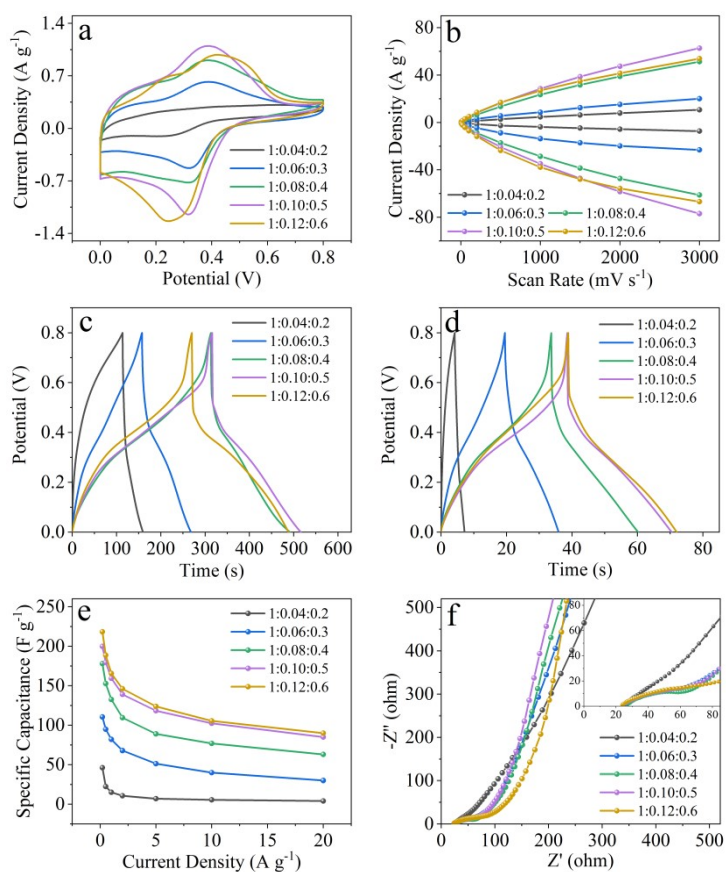

**Figure S24.** Electrochemical performance of ANF/rHGO/PANI composite supercapacitors with different mass ratios of ANF, HGO and PANI: a) CV curves at  $10 \text{ mV s}^{-1}$ , b) The plots of current density versus scan rate from CV curves, c) GCD curves at  $0.2 \text{ A g}^{-1}$ , d) GCD curves at  $1 \text{ A g}^{-1}$ , e) Specific capacitance against various

current densities, and f) EIS plots.

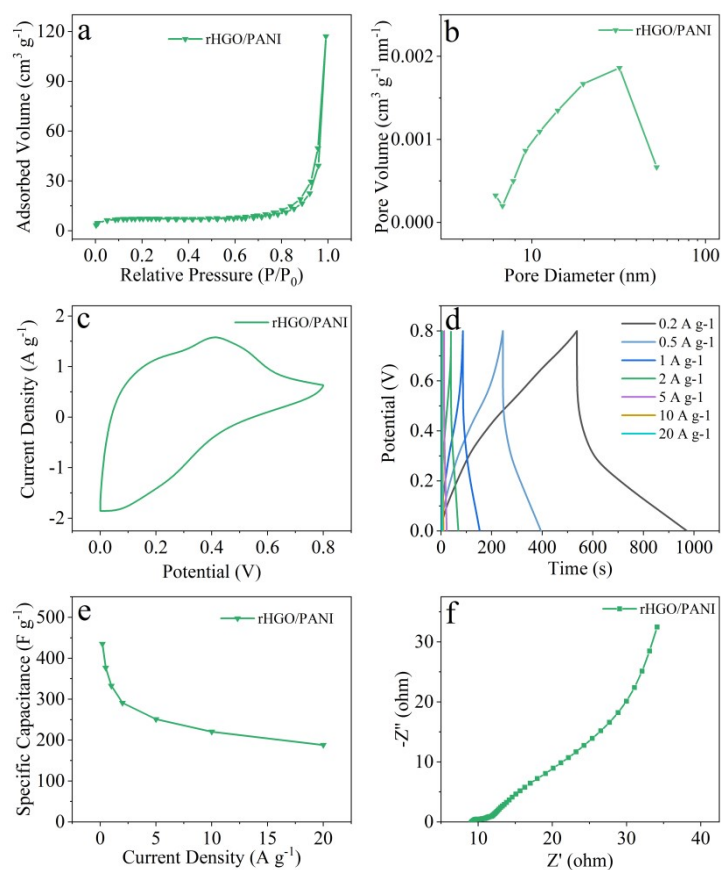

**Figure S25.** a) Adsorption-desorption isotherm curves, and b) the pore size distribution by the BJH method. c-f) The electrochemical performance of rHGO/PANI supercapacitor: c) CV curve at  $10 \text{ mV s}^{-1}$ , d) GCD curves at different current densities, e) Specific capacitance against current density, and f) EIS plot.

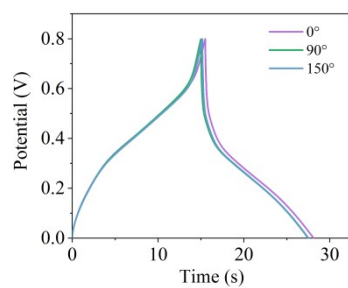

**Figure S26.** GCD curves at  $2 \text{ A g}^{-1}$  under different bending angles ( $0, 90$  and  $150^\circ$ ) for ANF/rHGO/PANI supercapacitors.

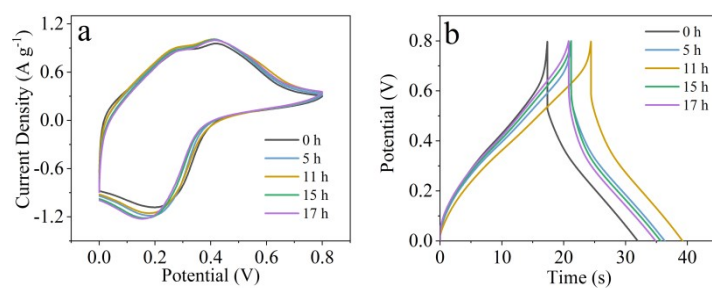

**Figure S27.** a) CV curves at  $10 \text{ mV s}^{-1}$  and b) GCD curves at  $2 \text{ A g}^{-1}$  for different times under keeping tensile force of  $25 \text{ g}$  for ANF/rHGO/PANI supercapacitors.

**Table S1.** The data of FT-IR spectra for the functional groups of as-prepared samples.

| Assignment                                                       | Wavenumbers (cm <sup>-1</sup> ) |          |                |
|------------------------------------------------------------------|---------------------------------|----------|----------------|
|                                                                  | ANF                             | ANF/rHGO | ANF/rHGO/PANI  |
| C=O stretching vibrations                                        | 1655.6                          | 1653.7   | 1652.3         |
| C=C stretching vibrations of quinoid and benzenoid rings in PANI | --                              | --       | 1594.4, 1514.9 |
| N-H deformation vibrations                                       | 1556.3                          | 1542.8   | 1543.3         |
| C-N stretching of aromatic amine                                 | 1316.7                          | 1317.2   | 1315.8         |
| C-C ring stretching vibrations                                   | 1268.9                          | 1265.1   | 1268.9         |
| C-O-C stretching vibrations                                      | --                              | 1108.9   | 1109.4         |
| C-O stretching vibrations                                        | 1017.8                          | 1017.3   | 1017.3         |
| In-plane and out-of-plane bending vibrations of C-H              | 825.4                           | 823.0    | 824.9          |

**Table S2** Elemental Composition of XPS analysis for as-prepared samples.

| Samples       | C (at.%) | N (at.%) | O (at.%) |
|---------------|----------|----------|----------|
| ANF           | 79.7     | 9.3      | 11.0     |
| ANF/PANI      | 80.7     | 10.0     | 9.3      |
| ANF/HGO       | 79.6     | 6.6      | 13.8     |
| ANF/rHGO      | 80.0     | 8.5      | 11.5     |
| ANF/HGO/PANI  | 80.5     | 9.5      | 10.0     |
| ANF/rHGO/PANI | 81.0     | 9.6      | 9.4      |

**Table S3** C 1s spectra of C species in as-prepared samples, relative ratio (at.%)

| Samples       | C 1s    |      |      |      |      |                 |
|---------------|---------|------|------|------|------|-----------------|
|               | C-C/C=C | C-N  | C-O  | C=N  | C=O  | $\pi$ - $\pi^*$ |
| ANF           | 39.4    | 31.3 | --   | --   | 22.9 | 6.4             |
| ANF/PANI      | 41.9    | 24.1 | --   | 13.9 | 9.7  | 10.4            |
| ANF/HGO       | 43.1    | 20.5 | 18.6 | --   | 11.5 | 6.3             |
| ANF/rHGO      | 44.2    | 21.5 | 11.8 | --   | 12.6 | 9.9             |
| ANF/HGO/PANI  | 46.9    | 19.9 | 7.7  | 8.2  | 8.1  | 9.2             |
| ANF/rHGO/PANI | 47.8    | 20.7 | 5.8  | 6.9  | 8.9  | 9.9             |

**Table S4** The tensile strength results of ANF based materials in literatures.

| Sample                                      | Tensile strength (MPa)                  | Methods                                                                                 | Ref. |
|---------------------------------------------|-----------------------------------------|-----------------------------------------------------------------------------------------|------|
| ANF, 22% PPy/ANFs film                      | 125±8 at 10.2±1.6%<br>80±5 at 13.6±1.9% | Py in-situ polymerization in ANF and filtration                                         | S1   |
| ANF, 20% BNNS@PDA/ANF film                  | 93.5 at 21.3%<br>48 at 15%              | BNNS@PDA into ANF with a homogenizer and filtration                                     | S2   |
| 1% ANF, 20wt%-CNT FC-ANF/CNT aerogel films  | 1.8 at 10%<br>3.4 at 8%                 | ANF/CNT dispersion coated on Al foil to form hydrogel                                   | S3   |
| ANF, RGO/1wt%ANF films                      | ~95 at 2%,<br>41.7±2.0 at 1.2%          | GO/DMSO, ANF/DMSO mixed and filtration; 40 mg, 10-20 $\mu$ m                            | S4   |
| 0.4 wt% ANF aerogel fiber                   | 0.55 at 22%                             | ~300 $\mu$ m                                                                            | S5   |
| 0.7 wt% ANFGS/PMMA film (ANFGS:ANFS/GO=2:1) | 63.2 at 4.1%                            | ANFGS:GO/DMSO, ANF/DMSO mixed and centrifugation<br>ANFGS/PMMA: solution casting method | S6   |
| 8 wt% ANF ANF/CNT (1:20)                    | 855.7 ± 18.9<br>818.4 ± 16.2 at 2%      | Wet Spinning: 8 wt% ANF dispersion and 0.6 wt% CNT aqueous solutions                    | S7   |
| 0.1 wt% BANF                                | 138 ± 5.3 at 9%                         | aniline was polymerized in the                                                          | S8   |



|                                           |                                                            |                                                                                                                             |     |
|-------------------------------------------|------------------------------------------------------------|-----------------------------------------------------------------------------------------------------------------------------|-----|
| 73 wt% BANF/SWCNTs/15 wt% PANI film       | 40 ± 4 at 1.8%                                             | presence of BANFs and single-walled carbon nanotubes                                                                        |     |
| KNFs ~6.60 wt%                            | 72 at 19%                                                  | KNFS hydrothermal treatment,                                                                                                | S9  |
| PDMS/PVDF@KNFs membrane                   | 90 at 20%                                                  | evenly dispersed by stirring and mixed with PVDF and PDMS                                                                   |     |
| SEBS/Kevlar/Ag/PVA fiber                  | 35 at 220%                                                 | repeating adsorption and in situ reduction steps                                                                            | S10 |
| 0.015% ANF                                | 147.3 ± 7.1 at 3.8%                                        | PEDOT:PSS into ANF/DMSO with a homogenizer and filtration                                                                   | S11 |
| 20%ANFs/80%PEDOT:PSS film                 | 76.4 ± 2.5 at 2.2%                                         |                                                                                                                             |     |
| 1% ANF/EP plastic                         | 83.3 ± 2.4 at 4%                                           | ANF into EP with a homogenizer, adding curing agent for molding                                                             | S12 |
| 2% KNA                                    | 1.27 at 12.9%                                              | KNA aerogel films: freeze-drying                                                                                            |     |
| KNA/PEG aerogel film                      | 2.1 at 20%                                                 | KNA/PEG: KNA films were immersed in melting PCM and cooled to room temperature                                              | S13 |
| 2 wt% ANF                                 | 196 at 16.1%                                               | Spin coating to deposit ANF film,                                                                                           | S14 |
| 34.7 vol% Au-ANF film                     | 96 at 9.1%                                                 | vacuum filtration to add Au NPs                                                                                             |     |
| 1.5 wt% ANF                               | 185 at 11%                                                 | Spin coating to deposit ANF film,                                                                                           |     |
| 40.9 wt% PANI/ANF film                    | 179 at 17.5%                                               | and vacuum filtration to add PANI                                                                                           | S15 |
| 0.5 mg/mL ANF papers                      | 235.9 at 24.8%                                             | ANF hydrogel: vacuum filtrate                                                                                               | S16 |
| ANF-MXene/AgNW papers (20 wt% MXene/AgNW) | 155 at 13%                                                 | ANF (DMSO)<br>ANF-MXene/AgNW: vacuum filtrate to deposit MXene/AgNW                                                         |     |
| Kevlar fibers                             | 2.0 MPa m <sup>3</sup> kg <sup>-1</sup> at                 | Kevlar fibers were aligned inside                                                                                           | S17 |
| 38.1% rGO hydrogel-Kevlar fibers          | 2.7%<br>1.6 MPa m <sup>3</sup> kg <sup>-1</sup> at<br>2.7% | the tube and mixed with GO dispersion to hydrothermal react                                                                 |     |
| ANFW (water) Membranes                    | 203.92 at 1.96%                                            | ANFs-DMSO dispersion was                                                                                                    | S18 |
| ANFE (ethanol) Membranes                  | 141.34 at 3.28%                                            | blended with a given ration followed by a desired amount of DI water or ethanol to substitute DMSO and precipitate the ANFs |     |
| 0.1% ANF aerogel (axial direction)        | 0.095 ± 0.003 at 70%                                       | ANF dispersion: CaCl <sub>2</sub> , DME, PPD                                                                                | S19 |
| ANF aerogel (radial direction)            | 0.165 ± 0.005 at 70% (compression)                         | and TPC were added in NMP in turn, and diluted by NMP<br>ANF aerogel: filtration and filtration                             |     |

|                                 |                       |                                                                                   |             |
|---------------------------------|-----------------------|-----------------------------------------------------------------------------------|-------------|
| 0.2% ANF film                   | 255.1 ± 7.1 at 18%    | ANF dispersion vacuum filtrate and                                                | S20         |
| 4.6 wt% PANI@ANF film           | 233.3 ± 6.1 at 17.5%  | dry, and ANF film immerse in the PANI dispersion                                  |             |
| PMF film (5.7 wt% Au/ANF)       | 14.42 at 5.25%        | PA was added into the ANF solution, and Au NP solution was added, then filtration | S21         |
| MXene/11% ANF membrane (ANF 1%) | 101 at 4.6%           | MXene (DMSO), ANF (DMSO) with a homogenizer and filtration                        | S22         |
| PPH                             | 5.3 MPa at 250%       | Polymerization of Ani in PVA and ABA                                              | S23         |
| <b>1.0% ANF</b>                 | <b>105.4 at 8.72%</b> | <b>ANF, HGO and PANI mixed and</b>                                                | <b>This</b> |
| <b>ANF/rHGO</b>                 | <b>121.4 at 9.0%</b>  | <b>adding water, hydrothermal</b>                                                 | <b>work</b> |
| <b>ANF/rHGO/PANI film</b>       | <b>95.5 at 7.7%</b>   |                                                                                   |             |

**Table S5** The comparison of electrochemical performance of ANF/rHGO/PANI supercapacitor with reported results in literature.

| Samples                            | $C_s$                                                                                                | Test system                                   | Ref. |
|------------------------------------|------------------------------------------------------------------------------------------------------|-----------------------------------------------|------|
| RG0/1wt% ANF                       | 171 F g <sup>-1</sup> , 0.5 A g <sup>-1</sup><br>155 F g <sup>-1</sup> , 10 mV s <sup>-1</sup>       | Two-electrode                                 | S4   |
| 25wt%TRGO/ANF                      | 116 μF cm <sup>-2</sup> , 10 mV s <sup>-1</sup>                                                      | Three-electrode                               | S24  |
| rGO(ANF <sub>2wt%</sub> ) hydrogel | ~158 F g <sup>-1</sup> , 5 mV s <sup>-1</sup>                                                        | Two-electrode                                 | S25  |
| ANF Sheath on Dry-Spun CNT Wires   | 0.75 mF cm <sup>-1</sup> , 3.25 μA cm <sup>-1</sup>                                                  | Solid state supercapacitor                    | S7   |
| 38.1% rGO hydrogel-Kevlar cloth    | ~50 F g <sup>-1</sup> , 1 A g <sup>-1</sup>                                                          | Solid state supercapacitor                    | S17  |
| 20 wt%ANFs/PEDOT:PSS               | 111.5 F g <sup>-1</sup> , 0.5 mA cm <sup>-3</sup><br>12.8 F g <sup>-1</sup> , 0.1 A cm <sup>-3</sup> | Three-electrode<br>Solid state supercapacitor | S11  |
| PANI/BANF/12wt% CNT                | ~210 F g <sup>-1</sup> , 0.5 A g <sup>-1</sup><br>~180 F g <sup>-1</sup> , 10 mV s <sup>-1</sup>     | Two-electrode                                 | S8   |

|                             |                                                   |                                   |                  |
|-----------------------------|---------------------------------------------------|-----------------------------------|------------------|
| 4.6wt% PANI@ANF film        | 441.0 F g <sup>-1</sup> , 1 A g <sup>-1</sup>     | Three-electrode                   | S20              |
|                             | 138 F g <sup>-1</sup> , 0.5 A g <sup>-1</sup>     | Solid state supercapacitor        |                  |
| <b>62.5wt%ANF/rHGO/PANI</b> | <b>200 F g<sup>-1</sup>, 0.2 A g<sup>-1</sup></b> | <b>Solid state supercapacitor</b> | <b>This work</b> |
|                             | <b>193 F g<sup>-1</sup>, 10 mV s<sup>-1</sup></b> |                                   |                  |

## References

- [S1] X. Han, L. Lv, D. Yu, X. Wu and C. Li. *ACS Appl. Mater. Interfaces*, **2019**, *11*, 3466-3473.
- [S2] T. Ma, Y. Zhao, K. Ruan, X. Liu, J. Zhang, Y. Guo, X. Yang, J. Kong and J. Gu. *ACS Appl. Mater. Interfaces*, **2020**, *12*, 1677-1686.
- [S3] P. Hu, J. Lyu, C. Fu, W. B. Gong, J. Liao, W. Lu, Y. Chen and X. Zhang. *ACS Nano*, **2020**, *14*, 688-697.
- [S4] S. R. Kwon, J. Harris, T. Zhou, D. Loufakis, J. G. Boyd and J. L. Lutkenhaus. *ACS Nano*, **2017**, *11*, 6682-6690.
- [S5] Z. Liu, J. Lyu, D. Fang and X. Zhang. *ACS Nano*, **2019**, *13*, 5703-5711.
- [S6] J. Fan, Z. Shi, L. Zhang, J. Wang and J. Yin. *Nanoscale*, **2012**, *4*, 7046-7055.
- [S7] W. Cao, L. Yang, X. Qi, Y. Hou, J. Zhu and M. Yang. *Adv Funct Mater*, **2017**, *27*, 1701061.
- [S8] P. Flouda, A. H. Quinn, A. G. Patel, D. Loufakis, D. C. Lagoudas and J. L. Lutkenhaus. *Nanoscale*, **2020**, *12*, 16840-16850.
- [S9] D. Li, X. Gou, D. Wu and Z. Guo. *Nanoscale*, **2018**, *10*, 6695-6703.
- [S10] J. Li, L. Wang, X. Wang, Y. Yang, Z. Hu, L. Liu and Y. Huang. *ACS Appl.*

- Mater. Interfaces*, **2020**, *12*, 1427-1435.
- [S11] Y. Li, G. Ren, Z. Zhang, C. Teng, Y. Wu, X. Lu, Y. Zhu and L. Jiang. *J. Mater. Chem. A*, **2016**, *4*, 17324-17332.
- [S12] J. Lin, S. H. Bang, M. H. Malakooti and H. A. Sodano. *ACS Appl. Mater. Interfaces*, **2017**, *9*, 11167-11175.
- [S13] J. Lyu, Z. Liu, X. Wu, G. Li, D. Fang and X. Zhang. *ACS Nano*, **2019**, *13*, 2236-2245.
- [S14] J. Lyu, X. Wang, L. Liu, Y. Kim, E. K. Tanyi, H. Chi, W. Feng, L. Xu, T. Li, M. A. Noginov, C. Uher, M. D. Hammig and N. A. Kotov. *Adv Funct Mater*, **2016**, *26*, 8435-8445.
- [S15] J. Lyu, X. Zhao, X. Hou, Y. Zhang, T. Li and Y. Yan. *Compos Sci Technol*, **2017**, *149*, 159-165.
- [S16] Z. Ma, S. Kang, J. Ma, L. Shao, Y. Zhang, C. Liu, A. Wei, X. Xiang, L. Wei and J. Gu. *ACS Nano*, **2020**, *14*, 8368-8382.
- [S17] W. Sun, S. A. Shah, J. L. Lowery, J. H. Oh, J. L. Lutkenhaus and M. J. Green. *Adv. Mater. Interfaces*, **2019**, *6*, 1900786.
- [S18] Y. Wu, F. Wang and Y. Huang. *Polym. Composite*, **2019**, *40*, 2534-2538.
- [S19] C. Xie, L. He, Y. Shi, Z. X. Guo, T. Qiu and X. Tuo. *ACS Nano*, **2019**, *13*, 7811-7824.
- [S20] Q. Yin, H. Jia, A. Mohamed, Q. Ji and L. Hong. *Nanoscale*, **2020**, *12*, 5507-5520.
- [S21] H. Zhang, L. Feng, Y. Liang and T. Xu. *Nanoscale*, **2019**, *11*, 437-443.

- [S22] Z. Zhang, S. Yang, P. Zhang, J. Zhang, G. Chen and X. Feng. *Nat. Commun.*, **2019**, *10*, 2920.
- [S23] W. Li, F. Gao, X. Wang, N. Zhang and M. Ma. *Angew Chem Int Ed*, **2016**, *55*, 9196-9201.
- [S24] S. R. Kwon, M. B. Elinski, J. D. Batteas and J. L. Lutkenhaus. *ACS Appl. Mater. Interfaces*, **2017**, *9*, 17125-17135.
- [S25] S. A. Shah, D. Kulhanek, W. Sun, X. Zhao, S. Yu, D. Parviz, J. L. Lutkenhaus and M. J. Green. *J Colloid Interface Sci*, **2020**, *560*, 581-588.
